# Supplementary material for: Bi‐allelic pathogenic variants in PABPC1L cause oocyte maturation arrest and female infertility
Source: PubMed Central journal article supplement (PMC10245037; doi:10.15252/emmm.202217177), 2023-04-13
Supplement: EMMM-15-e17177-s005.pdf [file EMMM-15-e17177-s005.pdf]

## Expanded View Figures

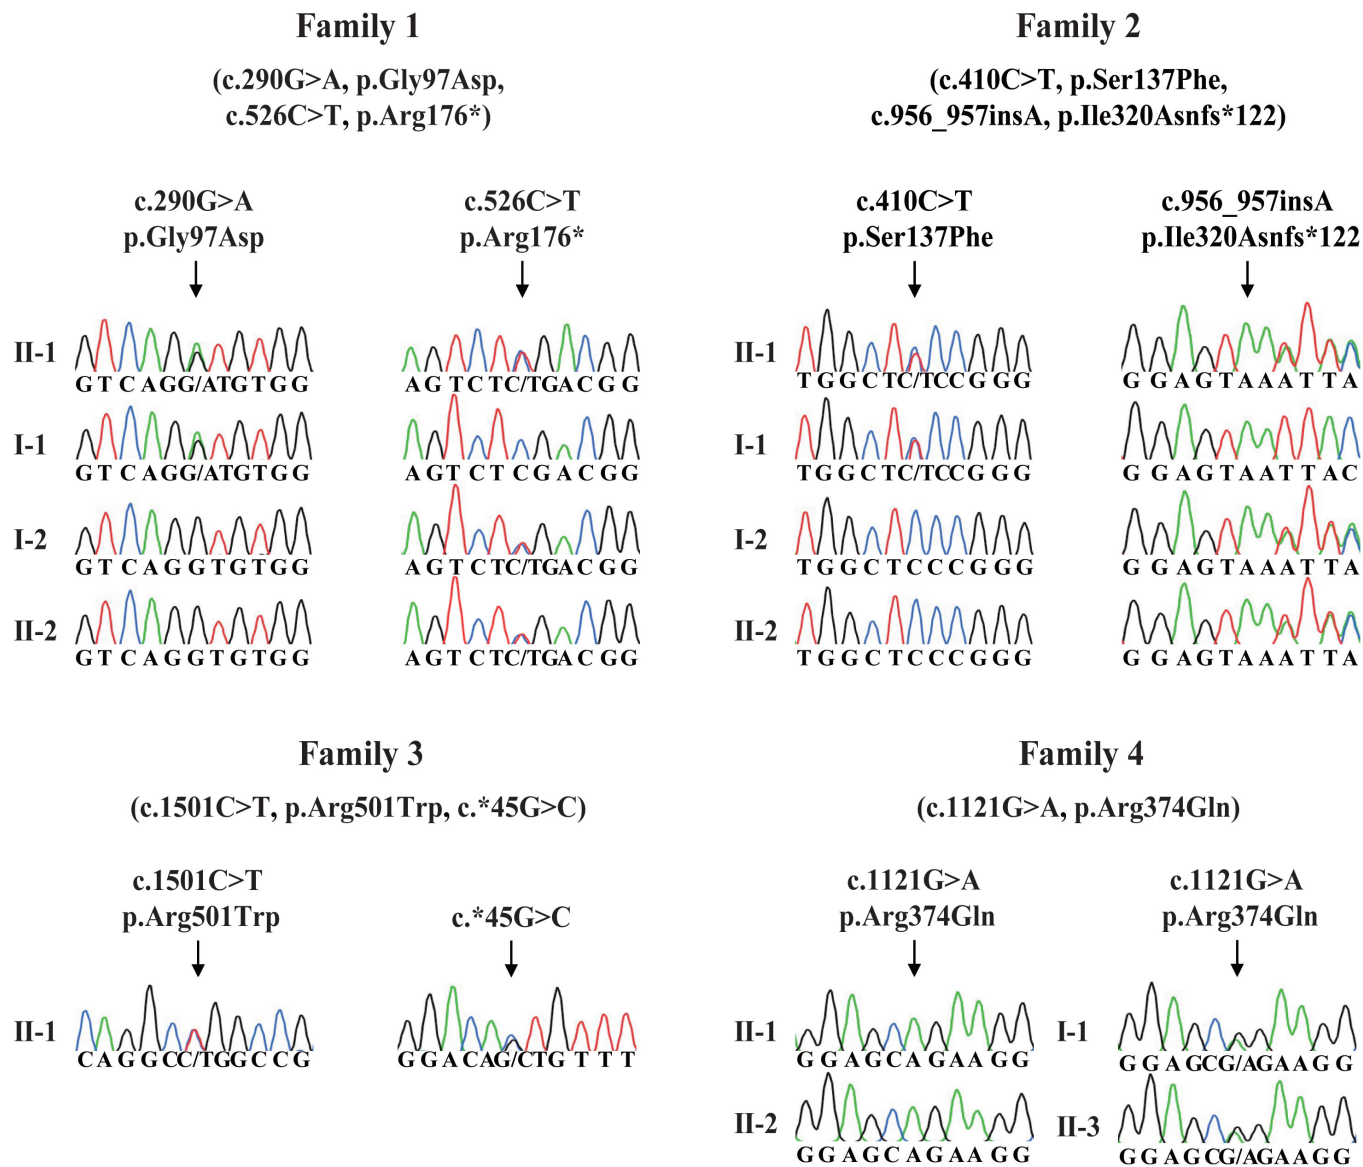

**Figure EV1. Sanger sequencing confirmation of *PABPC1L* variants in four families.**

*PABPC1L* variants observed in the four families were confirmed using Sanger sequencing. Arrows indicate the mutation sites.

Source data are available online for this figure.

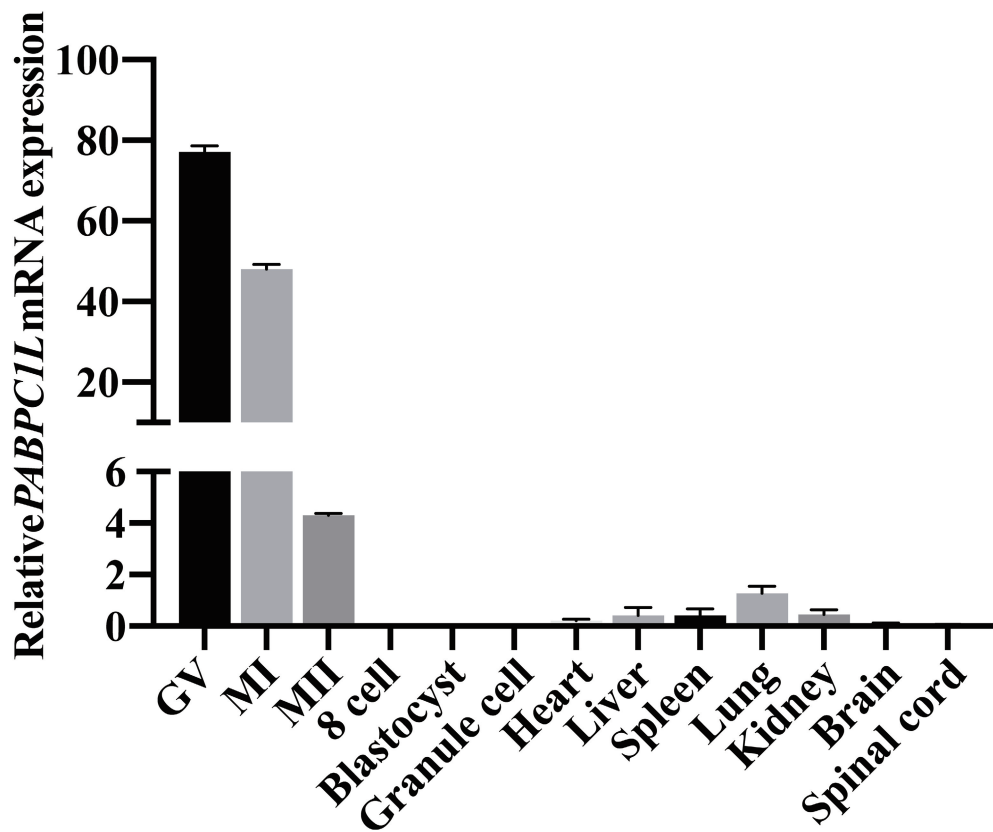

**Figure EV2. Relative expression level of PABPC1L mRNA in different stages of human oocytes, embryos and several somatic tissues.**

The relative expression of PABPC1L mRNA in different stages of human oocytes, early embryos, and several somatic tissues was measured by qRT-PCR and normalized to the expression of GAPDH mRNA (control).  $n = 3$  biological replicates. Error bars denote the SD.

Source data are available online for this figure.

**Figure EV3. Genotyping and phenotype analyses in homozygous Pabpc1l KI mice.**

- A Sanger sequencing showing the homozygous mutations in *Pabpc1l* KI mice. Red asterisks indicate the mutation sites, and the blue asterisk indicates the synonymous mutation site.
- B Ovary morphology of 12-week-old WT and *Pabpc1l* KI mice. Scale bar represents 1 mm.
- C Histological sections of ovaries from 12-week-old WT and *Pabpc1l* KI mice were stained with hematoxylin and eosin. Scale bars represent 200  $\mu\text{m}$ .
- D Representative images of superovulated oocytes of WT and *Pabpc1l* KI mice. The black arrows indicate PB1. Scale bar represents 100  $\mu\text{m}$ .
- E Quantitative analysis of the fertilization rate of WT and *Pabpc1l* KI mice. The number of analyzed embryos is indicated ( $N$ ).  $n = 8$  biological replicates for *Pabpc1l*<sup>WT/WT</sup>, *Pabpc1l*<sup>G97D/G97D</sup>, and *Pabpc1l*<sup>S137F/S137F</sup> mice.  $n = 2$  biological replicates for *Pabpc1l*<sup>R374Q/R374Q</sup> mice. The statistics are analyzed by unpaired two-tailed Student's  $t$ -test. Data are shown as mean and SD. ns, not significant.

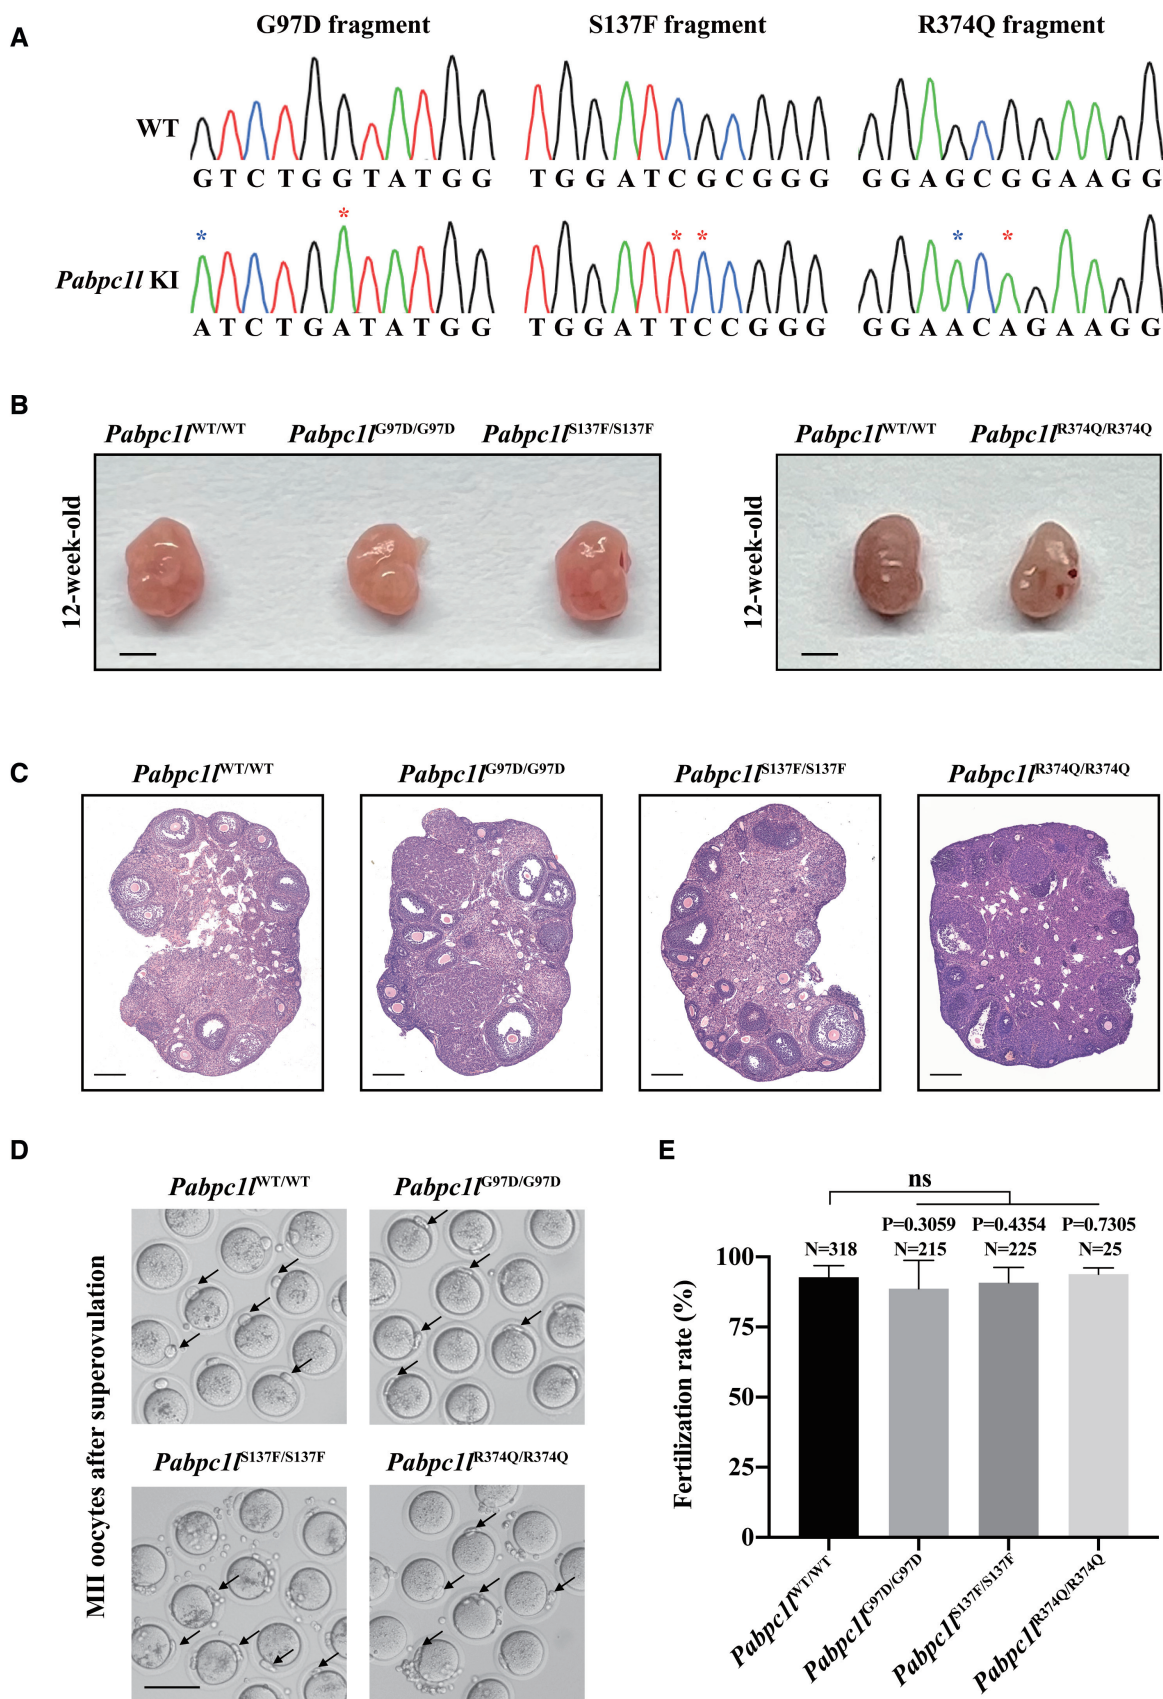

Figure EV3.
