# Supplementary material for: Bi‐allelic pathogenic variants in PABPC1L cause oocyte maturation arrest and female infertility
Source: PubMed Central journal article supplement (PMC10245037; doi:10.15252/emmm.202217177), 2023-04-13
Supplement: EMMM-15-e17177-s006.pdf [file EMMM-15-e17177-s006.pdf]

# APPENDIX

## **Bi-allelic Pathogenic Variants in *PABPC1L* Cause Oocyte Maturation Arrest and Female Infertility**

Weijie Wang<sup>1,†</sup>, Jing Guo<sup>2,†</sup>, Juanzi Shi<sup>3,†</sup>, Qun Li<sup>1,†</sup>, Biaobang Chen<sup>4</sup>, Zhiqi Pan<sup>1</sup>, Ronggui Qu<sup>1</sup>, Jing Fu<sup>5</sup>, Rong Shi<sup>3</sup>, Xia Xue<sup>3</sup>, Jian Mu<sup>1</sup>, Zihua Zhang<sup>1</sup>, Tianyu Wu<sup>1</sup>, Wenjing Wang<sup>1</sup>, Lin Zhao<sup>1</sup>, Qiaoli Li<sup>1</sup>, Lin He<sup>6</sup>, Xiaoxi Sun<sup>5</sup>, Qing Sang<sup>1</sup>, Ge Lin<sup>2\*</sup> & Lei Wang<sup>1\*\*</sup>

### **Table of contents**

|                                                                                                                   |   |
|-------------------------------------------------------------------------------------------------------------------|---|
| Appendix Table S1. Primers used for <i>PABPC1L</i> variants Sanger sequencing, mouse genotyping, and RT-qPCR..... | 2 |
|-------------------------------------------------------------------------------------------------------------------|---|

**Appendix Table S1. Primers used for *PABPCIL* variants Sanger sequencing, mouse genotyping, and RT-qPCR**

| Primer name                   | Primer sequence (5' to 3') | Application                        |                                   |
|-------------------------------|----------------------------|------------------------------------|-----------------------------------|
| <i>PABPCIL</i> -G97D-F        | TCCTCTTCCTTCTGTCCAGC       |                                    |                                   |
| <i>PABPCIL</i> -G97D-R        | GATTGTTGTTGACGGCCACT       |                                    |                                   |
| <i>PABPCIL</i> -R176*-F       | ATTGTCCTGCCAGTTTCCT        |                                    |                                   |
| <i>PABPCIL</i> -R176*-R       | GCTGTTGTCCCTCATCACCT       |                                    |                                   |
| <i>PABPCIL</i> -S137F-F       | CCCAGCCTTCCTTAATCCGT       |                                    |                                   |
| <i>PABPCIL</i> -S137F-R       | GGCTCACACTTCTAGGAGGG       |                                    |                                   |
| <i>PABPCIL</i> -I320Nfs*122-F | TCCAGCAGTTTCCCTTCCAT       | Primers used for Sanger sequencing |                                   |
| <i>PABPCIL</i> -I320Nfs*122-R | CAGCCCTCTCACTTCCAGA        |                                    |                                   |
| <i>PABPCIL</i> -R501W-F       | ACCAACAGTGCACAGTCTTC       |                                    |                                   |
| <i>PABPCIL</i> -R501W-R       | AAAACGTAATGCTGGCCCTC       |                                    |                                   |
| <i>PABPCIL</i> -*45G>C-F      | GTGGAGGGTGAAGGAGGTG        |                                    |                                   |
| <i>PABPCIL</i> -*45G>C-R      | CCCCAGTCATGTCTACCGTT       |                                    |                                   |
| <i>PABPCIL</i> -R374Q-F       | CCAGCAGCTCTTGTCTTGTC       |                                    |                                   |
| <i>PABPCIL</i> -R374Q-R       | CAGGCAGGAAGTAGCTGGAG       |                                    |                                   |
| <i>Pabpc1l</i> -G97D-KI-F     | CTTTCTGCAGTGTGTGAGGAGTA    |                                    | Primers used for mouse genotyping |
| <i>Pabpc1l</i> -G97D-KI-R     | GTGACCTCTAACAGTTCTGGGAAGA  |                                    |                                   |
| <i>Pabpc1l</i> -S137F-KI-F    | AGACTGGCTTTTCTAAACTTCCCC   |                                    |                                   |
| <i>Pabpc1l</i> -S137F-KI-R    | CTAAGGTTACACACCAAGGAAGGC   |                                    |                                   |
| <i>Pabpc1l</i> -R374Q-KI-F    | ACAGTAGGCCTGAGTAAATGAG     |                                    |                                   |
| <i>Pabpc1l</i> -R374Q-KI-R    | ACAGAGACTGGAAGACAAGATAG    |                                    |                                   |
| <i>hPABPCIL</i> -RT-F         | AGCGGCAGAATGAACTGAAGCG     |                                    |                                   |
| <i>hPABPCIL</i> -RT-R         | CGTCATCAATGGAGTCGTCCAG     |                                    |                                   |
| <i>hGAPDH</i> -RT-F           | CAAATTCCATGGCACCCTCA       |                                    |                                   |
| <i>hGAPDH</i> -RT-R           | GGCAGAGATGATGACCCTTT       |                                    |                                   |
| <i>mMos</i> -RT-F             | AGTGGTTGCCTACAATCTGCGC     |                                    |                                   |
| <i>mMos</i> -RT-R             | GAGGTCCTTTGGAGCAGTTCT      |                                    |                                   |
| <i>mMapkapk3</i> -RT-F        | GTGGATTCCCACCCTTCTACTC     |                                    |                                   |
| <i>mMapkapk3</i> -RT-R        | GTCTTCAGGAGCAGGCGGATTA     |                                    |                                   |
| <i>mMap2k6</i> -RT-F          | TGGTGGAGAAGATGCGTCACGT     | Primers used for qRT-PCR           |                                   |
| <i>mMap2k6</i> -RT-R          | GTCACGGTGAATGGACAGTCCA     |                                    |                                   |
| <i>mMap3k4</i> -RT-F          | TTGTGCCTCAGGTGGAGACTGT     |                                    |                                   |
| <i>mMap3k4</i> -RT-R          | GCTGGCTAGATGTCTGCTCATG     |                                    |                                   |
| <i>mMap3k2</i> -RT-F          | CCCAGAGTATGACGACAGTCGA     |                                    |                                   |
| <i>mMap3k2</i> -RT-R          | GGTAGACCCTACCAAAGCTCC      |                                    |                                   |
| <i>mFgfr1</i> -RT-F           | GCCTCACATTCAAGTGGCTGAAG    |                                    |                                   |
| <i>mFgfr1</i> -RT-R           | AGCACCTCCATTTCTTGTTCGG     |                                    |                                   |
| <i>mPabpc1l</i> -RT-F         | GTGCCTCACACGCAGAGAGTAG     |                                    |                                   |
| <i>mPabpc1l</i> -RT-R         | CTGAGGTTCTCTATGTGGCAC      |                                    |                                   |
| <i>mActb</i> -RT-F            | CATTGCTGACAGGATGCAGAAGG    |                                    |                                   |
| <i>mActb</i> --RT-R           | TGCTGGAAGGTGGACAGTGAGG     |                                    |                                   |
