# Supplementary material for: Bi‐allelic pathogenic variants in PABPC1L cause oocyte maturation arrest and female infertility
Source: PubMed Central journal article supplement (PMC10245037; doi:10.15252/emmm.202217177), 2023-04-13
Supplement: EMMM-15-e17177-s009.pdf [file EMMM-15-e17177-s009.pdf]

# Bi-allelic Pathogenic Variants in PABPC1L Cause Oocyte Maturation Arrest and Female Infertility

Lei Wang, Weijie Wang, Jing Guo, Juanzi Shi, Qun Li, Biaobang Chen, Zhiqi Pan, Ronggui Qu, Jing Fu, Rong Shi, Xia Xue, Jian Mu, Zihua Zhang, Tianyu Wu, Wenjing Wang, Lin Zhao, Qiaoli Li, Lin He, Xiaoxi Sun, Qing Sang, and Ge Lin

DOI: [10.15252/emmm.202217177](https://doi.org/10.15252/emmm.202217177)

Corresponding authors: Lei Wang ([wangleiwanglei@fudan.edu.cn](mailto:wangleiwanglei@fudan.edu.cn)) , Ge Lin ([linggf@hotmail.com](mailto:linggf@hotmail.com))

---

## Review Timeline:

|                     |             |
|---------------------|-------------|
| Submission Date:    | 15th Nov 22 |
| Editorial Decision: | 8th Dec 22  |
| Revision Received:  | 22nd Feb 23 |
| Editorial Decision: | 20th Mar 23 |
| Revision Received:  | 27th Mar 23 |
| Accepted:           | 29th Mar 23 |

---

Editor: *Zeljko Durdevic*

## Transaction Report:

(Note: With the exception of the correction of typographical or spelling errors that could be a source of ambiguity, letters and reports are not edited. Depending on transfer agreements, referee reports obtained elsewhere may or may not be included in this compilation. Referee reports are anonymous unless the Referee chooses to sign their reports.)

8th Dec 2022

Dear Dr. Wang,

Thank you for the submission of your manuscript to EMBO Molecular Medicine. We have now received feedback from the three reviewers who agreed to evaluate your manuscript. As you will see from the reports, all three referees support publication of the study but they also raise important concerns that should be addressed in a major revision.

Further consideration of a revision that addresses reviewers' concerns in full will entail a second round of review. EMBO Molecular Medicine encourages a single round of revision only and therefore, acceptance or rejection of the manuscript will depend on the completeness of your responses included in the next, final version of the manuscript. For this reason, and to save you from any frustrations in the end, I would strongly advise against returning an incomplete revision.

We would welcome the submission of a revised version within three months for further consideration. Please let us know if you require longer to complete the revision.

I look forward to receiving your revised manuscript.

Yours sincerely,

Zeljko Durdevic

Zeljko Durdevic  
Editor  
EMBO Molecular Medicine

\*\*\*\*\*

When submitting your revised manuscript, please carefully review the instructions that follow below. We perform an initial quality control of all revised manuscripts before re-review; failure to include requested items will delay the evaluation of your revision.

We require:

- 1) A .docx formatted version of the manuscript text (including legends for main figures, EV figures and tables). Please make sure that the changes are highlighted to be clearly visible.
- 2) Individual production quality figure files as .eps, .tif, .jpg (one file per figure). For guidance, download the 'Figure Guide PDF': (<https://www.embopress.org/page/journal/17574684/authorguide#figureformat>).
- 3) A .docx formatted letter INCLUDING the reviewers' reports and your detailed point-by-point responses to their comments. As part of the EMBO Press transparent editorial process, the point-by-point response is part of the Review Process File (RPF), which will be published alongside your paper.
- 4) A complete author checklist, which you can download from our author guidelines (<https://www.embopress.org/page/journal/17574684/authorguide#submissionofrevisions>). Please insert information in the checklist that is also reflected in the manuscript. The completed author checklist will also be part of the RPF.
- 5) Please note that all corresponding authors are required to supply an ORCID ID for their name upon submission of a revised manuscript.
- 6) It is mandatory to include a 'Data Availability' section after the Materials and Methods. Before submitting your revision, primary datasets produced in this study need to be deposited in an appropriate public database, and the accession numbers and database listed under 'Data Availability'. Please remember to provide a reviewer password if the datasets are not yet public (see

<https://www.embopress.org/page/journal/17574684/authorguide#dataavailability>).

In case you have no data that requires deposition in a public database, please state so in this section. Note that the Data Availability Section is restricted to new primary data that are part of this study.

7) For data quantification: please specify the name of the statistical test used to generate error bars and P values, the number (n) of independent experiments (specify technical or biological replicates) underlying each data point and the test used to calculate p-values in each figure legend. The figure legends should contain a basic description of n, P and the test applied. Graphs must include a description of the bars and the error bars (s.d., s.e.m.). See also 'Figure Legend' guidelines: <https://www.embopress.org/page/journal/17574684/authorguide#figureformat>

8) At EMBO Press we ask authors to provide source data for the main manuscript figures. Our source data coordinator will contact you to discuss which figure panels we would need source data for and will also provide you with helpful tips on how to upload and organize the files.

9) Our journal encourages inclusion of \*data citations in the reference list\* to directly cite datasets that were re-used and obtained from public databases. Data citations in the article text are distinct from normal bibliographical citations and should directly link to the database records from which the data can be accessed. In the main text, data citations are formatted as follows: "Data ref: Smith et al, 2001" or "Data ref: NCBI Sequence Read Archive PRJNA342805, 2017". In the Reference list, data citations must be labeled with "[DATASET]". A data reference must provide the database name, accession number/identifiers and a resolvable link to the landing page from which the data can be accessed at the end of the reference. Further instructions are available at .

10) We replaced Supplementary Information with Expanded View (EV) Figures and Tables that are collapsible/expandable online. A maximum of 5 EV Figures can be typeset. EV Figures should be cited as 'Figure EV1, Figure EV2' etc... in the text and their respective legends should be included in the main text after the legends of regular figures.

- For the figures that you do NOT wish to display as Expanded View figures, they should be bundled together with their legends in a single PDF file called \*Appendix\*, which should start with a short Table of Content. Appendix figures should be referred to in the main text as: "Appendix Figure S1, Appendix Figure S2" etc.

- Additional Tables/Datasets should be labeled and referred to as Table EV1, Dataset EV1, etc. Legends have to be provided in a separate tab in case of .xls files. Alternatively, the legend can be supplied as a separate text file (README) and zipped together with the Table/Dataset file.

See detailed instructions here:

11) The paper explained: EMBO Molecular Medicine articles are accompanied by a summary of the articles to emphasize the major findings in the paper and their medical implications for the non-specialist reader. Please provide a draft summary of your article highlighting

- the medical issue you are addressing,
- the results obtained and
- their clinical impact.

This may be edited to ensure that readers understand the significance and context of the research. Please refer to any of our published articles for an example.

12) For more information: There is space at the end of each article to list relevant web links for further consultation by our readers. Could you identify some relevant ones and provide such information as well? Some examples are patient associations, relevant databases, OMIM/proteins/genes links, author's websites, etc...

13) Author contributions: You will be asked to provide CRediT (Contributor Role Taxonomy) terms in the submission system. These replace a narrative author contribution section in the manuscript.

14) A Conflict of Interest statement should be provided in the main text.

15) Every published paper now includes a 'Synopsis' to further enhance discoverability. Synopses are displayed on the journal webpage and are freely accessible to all readers. They include a short stand first (maximum of 300 characters, including space)

as well as 2-5 one-sentences bullet points that summarizes the paper. Please write the bullet points to summarize the key NEW findings. They should be designed to be complementary to the abstract - i.e. not repeat the same text. We encourage inclusion of key acronyms and quantitative information (maximum of 30 words / bullet point). Please use the passive voice. Please attach these in a separate file or send them by email, we will incorporate them accordingly.

Please also suggest a striking image or visual abstract to illustrate your article as a PNG file 550 px wide x 300-600 px high.

EMBO Molecular Medicine has a "scooping protection" policy, whereby similar findings that are published by others during review or revision are not a criterion for rejection. Should you decide to submit a revised version, I do ask that you get in touch after three months if you have not completed it, to update us on the status.

Please note: When submitting your revision you will be prompted to enter your funding and payment information. This will allow Wiley to send you a quote for the article processing charge (APC) in case of acceptance. This quote takes into account any reduction or fee waivers that you may be eligible for. Authors do not need to pay any fees before their manuscript is accepted and transferred to the publisher.

EMBO Press participates in many Publish and Read agreements that allow authors to publish Open Access with reduced/no publication charges. Check your eligibility: <https://authorservices.wiley.com/author-resources/Journal-Authors/open-access/affiliation-policies-payments/index.html>

\*\*\*\*\* Reviewer's comments \*\*\*\*\*

Referee #1 (Remarks for Author):

In the work of Weijie Wang et al, exome studies of five affected patients from four families exhibiting infertility with maturation arrest and unsuccessful IVF or ICSI were performed. They allowed to identify compound heterozygous or homozygous pathogenic or likely pathogenic coding missense or truncating variants of PABPC1L, the predominant polyA binding protein in human oocytes and early embryos, and one missense variant in the 3' non coding region. These variants are functional in vitro since they yield truncating proteins, lower expression of the protein or induced mislocalization in HELA cells except for the p.Arg374Gln variant. All the missense variants except the p.Arg374Gln variant led to a significant decrease in mRNA translational activity in Hela cells. RNA pull-down experiments revealed that all missense variants except the p.Arg374Gln variant dramatically reduced the RNA-binding ability of the WT PABC1L. Knock in mice corresponding to the G97D and the S137F variants were generated by the CRISPR-Cas 9 technology. These mice ovulated mature oocytes, the fertilization rates of KI oocytes was normal however zygotes arrested at an early stage and failed to develop into blastocysts at 96h after fertilization. The variants are thus pathogenic with species-specific differences in humans and mice. Of note in family 2 and 3 however few retrieved oocytes could be fertilized but embryos obtained arrested at an early stage. RNA-seq studies showed that the upstream activator of the MAPK, Mos, was significantly increased in G97D and S137F zygotes. Qrt-PCR confirmed this higher expression. Significantly elevated pERK1/2 levels were found in G97D and S137F zygotes strongly suggesting an activation of the Mos-MAPK pathway in Pabpc1l Ki zygotes. Micro injection of human MOS cRNAs indicates that the PABPC1L pathogenic variants lead to an increased Mos expression and activation of the Mos-MAPK pathway in zygotes, resulting in early embryonic arrest and female infertility in knock-in mice.

This work is interesting. Experiments and results are clearly described This is a comprehensive study with in vitro and in vivo knock in experiments. A novel mechanism of oocyte maturation arrest in humans is reported in this study.

Several points need to be clarified :

In the introduction and the discussion causes of oocyte maturation arrest in humans are reported. ECAT1 and ZP1,2,3,4 should also be discussed.

In Family 3 there is only one child. Is there any explanation? How old was the mother at the time of pregnancy? Has she had any failed attempts to get pregnant? This would argue for a functional effect of a heterozygous variant in humans.

No significant in vitro or in vivo functional effect is described for the p.Arg374Gln variant, homozygous in family 4. A short list of variants from exome analysis could be discussed to ensure that no other causative gene could be involved in the infertility of this family. Without functional effect or any other cause identified, no causal evidence is provided for family 4. It should be removed from this study.

Referee #2 (Comments on Novelty/Model System for Author):

Original findings. Proof of the functionality/causality of the newly identified mutations

Referee #2 (Remarks for Author):

This study identified for the first time pathogenic variants in the PABPC1L gene, in five patients suffering from mainly oocyte maturation arrest. Thorough functional analysis of these variants was performed in vitro and in mouse to confirm their causality, which makes the paper scientifically sound. In addition, the authors aimed to unravel the molecular cascade leading to the observed phenotype, by performing RNAseq analysis and assessment of the Mos-MAPK pathway. Assessment of this pathway feels a bit arbitrarily chosen, since it was not the most prominent DEG, and it is a pity that the RNAseq data was not assessed in a more unbiased manner. The authors should address this.

Concerning the results section, a lot of the text can be found back in the tables and figures, so some reduction of text should be performed. For example, table 1 contains all the details of patients which are easy to follow, so it's not necessary to add all the descriptive traits of involved patients in the results section.

Regarding the KI experiments in mice, how was the gene editing efficiency confirmed in the KI mice? For example, was there any mosaic gene editing observed which could bias the infertility phenotype? The authors performed IVF in the generated KI mice. Was in vivo reproduction successful in these KI mice? Are the authors capable of performing ICSI? Sometimes after performing ICSI, a more severe infertility phenotype can be observed compared to IVF, for example with PLCz KO male mice.

Another point to address is the lack of experimental analysis on the oocytes from these patients during/after infertility treatment. The authors should acknowledge this shortcoming.

Finally, it would be of added value to know from the authors which possible treatments options could be investigated to overcome this infertility problem? Nonetheless, the manuscript is clearly organized and well written. The study is of high quality and therefore, I support these results suitable for publication EMBO Molecular Medicine, following some minor modifications according to the comments listed below.

#### Minor remarks

- Line 28: I would not describe it as a common cause
- Line 115: PB1 oocyte is not a commonly used term, compared to GV and MI/MII oocytes, so please revise this
- Line 145: "The affected individual in family 2 carried the compound heterozygous variants consisting of a missense variant c.410C>T (p.Ser137Phe) and a frameshift insertion variant c.956\_957insA (p.Ile320Asnfs\*122)."  
The sentence might need some restructuring. An individual carrying the heterozygous variants consisting of ... feels as incorrect use of terminology.
- Line 164: "We measured the expression of PABPC1L mRNA and found that PABPC1L was highly expressed in human immature GV and MI oocytes as well as in the lung, but was poorly expressed in mature MII oocyte, early embryos, and other somatic tissues (Fig 1D), suggesting an important role for PABPC1L in human oocyte maturation."  
Clarify in the manuscript that this data was obtained in control samples.
- Line 170: "To evaluate the functional effects of the identified pathogenic variants in vitro, we first performed immunoblot analysis in HeLa cells transfected with WT or mutant PABPC1L constructs."  
Clarify in the manuscript what type of constructs: plasmid delivery
- Line 248: Here, I would first describe the data more generalized and only towards the end of the paragraph start focussing on the Mos-MAPK, to show that you work from generalized interpretation to targeted interpretation. Clarify a bit more why you focus on the Mos-MAPK in particular, and not the other highly differentially expressed genes.
- Line 297: "The infertile phenotype can be explained by abnormal activation of the Mos-MAPK pathway in zygotes."  
I believe this statement is too strong. For sure, Mos-MAPK is dysregulated in this model, but this is only one step in the molecular cascade leading to the observed phenotype. Please reconsider this statement.  
In the discussion, you approach this more carefully, which is better.
- Line 337: "Furthermore, all embryos obtained from the affected individuals in families 2 and 3 were arrested at an early stage, suggesting that PABPC1L also play an important role in early embryonic development prior to ZGA."  
I would rather state that zygote cleavage is compromised, given the drop in developmental rate between zygote and 2-cell stage shown in figure 4B.
- Line 368: "In addition, Pabpc1l KI mice harbouring homozygous missense variants had a milder phenotype than affected individuals in families 1 and 2 harboring compound heterozygous variants consisting of a missense variant and a truncating variant."  
I would remove this sentence and keep comparisons between different genotypes within one species. So I would only compare mouse with mouse (so KO mouse with KI mouse) and human with human (missense with nonsense).
- Discussion: You identified novel pathogenic variants in PABPC1L leading to the observed phenotype, but as mentioned in the introduction, the genetic basis and the mechanisms involved in the majority of affected individuals remain unknown. To the discussion, you could add the frequency/pick-up rate of variants in the PABPC1L gene and add some speculation on the missing genetic basis in the majority of patients. In what type of pathways could we still find novel pathogenic variants?
- Line 541: "Clean reads were aligned to the human genome hg38 using STAR and StringTie."  
wasn't RNAseq performed on mouse?

- Line 558: The journal doesn't require you to deposit the raw sequencing data in a database?

Referee #3 (Remarks for Author):

This interesting and well-written manuscript by Wang et al identifies several infertile woman who exhibit defective oocyte development, and find that they bear biallelic mutations in the very interesting gene PABPC1L. In most cases, pedigree genotyping was possible, enabling the authors to reveal phasing and a recessive mode of inheritance. This paper is distinguished by the validation experiments performed by the authors. They performed various assays tailored to the allele type (e.g., mismatches vs premature stops), including transfection of mutant constructs into HeLa cells to confirm predicted protein truncations and functional defects in reporter gene translation or RNA binding. Critically, the authors generate mouse models for the nonsynonymous alleles, and find that they cause infertility phenotypes that essentially confirm the pathogenicity of the human alleles (and reveal subtle differences in mouse vs human phenotypes that are probably reflective of species differences).

Overall, this is an elegant paper with no significant weaknesses. The data support the conclusions. The experimental confirmations of variant effects set this paper aside from many other reports of infertility-causing alleles with far less evidence. I make only the following 3 minor suggestions.

- last sentence of abstract. It isn't clear if the "new marker for genetic diagnosis..." is PABPC1L or MOS mRNA levels. PABPC1L isn't really a "marker" but potential candidate to be screened for causes of infertility.

- Results section starts abruptly on line 104. Maybe an introductory sentence about the patient pool.

- sequence traces probably unnecessary in Fig. 1 (could go to Supplemental).

## Responses to reviewers

\*\*\*\*\* Reviewer's comments \*\*\*\*\*

Referee #1 (Remarks for Author):

In the work of Weijie Wang et al, exome studies of five affected patients from four families exhibiting infertility with maturation arrest and unsuccessful IVF or ICSI were performed. They allowed to identify compound heterozygous or homozygous pathogenic or likely pathogenic coding missense or truncating variants of PABPC1L, the predominant polyA binding protein in human oocytes and early embryos, and one missense variant in the 3' non coding region. These variants are functional in vitro since they yield truncating proteins, lower expression of the protein or induced mislocalization in HELA cells except for the p.Arg374Gln variant. All the missense variants except the p.Arg374Gln variant led to a significant decrease in mRNA translational activity in Hela cells. RNA pull-down experiments revealed that all missense variants except the p.Arg374Gln variant dramatically reduced the RNA-binding ability of the WT PABPC1L. Knock in mice corresponding to the G97D and the S137F variants were generated by the CRISPR-Cas 9 technology. These mice ovulated mature oocytes, the fertilization rates of KI oocytes was normal however zygotes arrested at an early stage and failed to develop into blastocysts at 96h after fertilization. The variants are thus pathogenic with species-specific differences in humans and mice. Of note in family 2 and 3 however few retrieved oocytes could be fertilized but embryos obtained arrested at an early stage. RNA-seq studies showed that the upstream activator of the MAPK, Mos, was significantly increased in G97D and S137F zygotes. Qrt-PCR confirmed this higher expression. Significantly elevated pERK1/2 levels were found in G97D and S137F zygotes strongly suggesting an activation of the Mos-MAPK pathway in Pabpc1l Ki zygotes. Micro injection of human MOS cRNAs indicates that the PABPC1L pathogenic variants lead to an increased Mos expression and activation of the Mos-MAPK pathway in zygotes, resulting in early embryonic arrest and female infertility in knock-in mice. This work is interesting. Experiments and results are clearly described This is a comprehensive study with in vitro and in vivo knock in experiments. A novel mechanism of oocyte maturation arrest in humans is reported in this study.

Response: Thank you for your positive assessment.

Several points need to be clarified :

In the introduction and the discussion causes of oocyte maturation arrest in humans are reported. ECAT1 and ZP1,2,3,4 should also be discussed.

Response: According to your suggestion, we have discussed the role of ZP1,2,3,4 in human oocyte maturation as following: "Zona pellucida is an extracellular glycoprotein matrix composed of ZP1, ZP2, ZP3, and ZP4, which plays a vital role in oocyte maturation. Studies have reported that the variants in ZP1(MIM: 195000), ZP2 (MIM: 182888), and ZP3 (MIM: 182889) affect the formation of zona pellucida and result in female infertility (Dai *et al*, 2019; Huang *et al*, 2014; Liu *et al*, 2017), but there is no convincing evidence to prove that ZP4 (MIM: 613514) variant responsible for female infertility". We have added this into the Introduction section (Line 65-71).

Reference:

1. Dai C, Hu L, Gong F, Tan Y, Cai S, Zhang S, Dai J, Lu C, Chen J, Chen Y et al (2019) ZP2 pathogenic

variants cause in vitro fertilization failure and female infertility. *Genet Med* 21: 431-440

2. Huang HL, Lv C, Zhao YC, Li W, He XM, Li P, Sha AG, Tian X, Papasian CJ, Deng HW et al (2014) Mutant ZP1 in familial infertility. *N Engl J Med* 370: 1220-1226

3. Liu W, Li K, Bai D, Yin J, Tang Y, Chi F, Zhang L, Wang Y, Pan J, Liang S et al (2017) Dosage effects of ZP2 and ZP3 heterozygous mutations cause human infertility. *Hum Genet* 136: 975-985

In Family 3 there is only one child. Is there any explanation? How old was the mother at the time of pregnancy? Has she had any failed attempts to get pregnant? This would argue for a functional effect of a heterozygous variant in humans.

Response: In family 3, there is only one child. The mother was pregnant at the age of 18 and gave birth to her daughter (Individual II-1) successfully. The mother didn't have any failed attempts to get pregnant.

No significant in vitro or in vivo functional effect is described for the p.Arg374Gln variant, homozygous in family 4. A short list of variants from exome analysis could be discussed to ensure that no other causative gene could be involved in the infertility of this family. Without functional effect or any other cause identified, no causal evidence is provided for family 4. It should be removed from this study.

Response: Thanks for the suggestion. To further confirm the pathogenicity of the variant c.1121G>A (p.Arg374Gln), we previously constructed *Pabpc1l* R374Q KI mice corresponding to this variant. During the reviewing of the manuscript, the KI mice has been produced. Phenotypic evaluation found that *Pabpc1l*<sup>R374Q/R374Q</sup> female mice were infertile characterized by early embryonic arrest (Fig 4A–C), which was consistent with the other two KI mice. In addition, immunofluorescence analysis showed that the level of pERK1/2 in the R374Q KI zygotes was significantly increased (Fig 6C), indicating that the Mos-MAPK pathway was also abnormally activated. These results fully demonstrate that the variant c.1121G>A (p.Arg374Gln) identified in family 4 has disruptive effects on protein function and ultimately leads to female infertility. We inferred that the biochemical mechanism of Arg374Gln *in vitro* may be different from other variants, but all variants have the similar pathological mechanism *in vivo*. We have added the relevant description to the Discussion section (Line 357-368).

Referee #2 (Comments on Novelty/Model System for Author):

Original findings. Proof of the functionality/causality of the newly identified mutations

Referee #2 (Remarks for Author):

This study identified for the first time pathogenic variants in the PABPC1L gene, in five patients suffering from mainly oocyte maturation arrest. Thorough functional analysis of these variants was performed in vitro and in mouse to confirm their causality, which makes the paper scientifically sound. In addition, the authors aimed to unravel the molecular cascade leading to the observed phenotype, by performing RNAseq analysis and assessment of the Mos-MAPK pathway. Assessment of this pathway feels a bit arbitrarily chosen, since it was not the most prominent DEG, and it is a pity that the RNAseq data was not assessed in a more unbiased manner. The authors should address this.

Response: Thank you for the suggestion. At the end of the analysis of RNA-seq data, we explain the reason why we chose to assess Mos-MAPK pathway as following “To further investigate the molecular mechanism,



we first analyzed the differentially expressed genes in G97D zygotes and mainly focused on oocyte-specific genes. We found that *Mos*, an upstream activator of MAPK cascade (Dupre *et al*, 2011), was the only oocyte-specific gene among the top 30 differentially expressed genes (Dataset EV1, Fig 5B). Then we checked the expression of *Mos* in S137F zygotes and observed that it was also up-regulated (Dataset EV1, Fig 5B). The up-regulation of *Mos* in KI zygotes is consistent with the activation of MAPK cascade revealed in GO analysis. The above RNA-seq analysis results strongly suggest that Mos-MAPK pathway is abnormally activated in KI zygote. In addition, studies have indicated that abnormal activation of Mos-MAPK pathway in embryo led to cleavage arrest (Haccard *et al*, 1993; Sagata *et al*, 1989; Verlhac *et al*, 2000), which is similar to the phenotype of early embryonic arrest in KI mice. Therefore, we supposed that the abnormal up-regulation of *Mos* expression and activation of the Mos-MAPK pathway in KI zygotes might be the potential mechanism of early embryonic arrest in *Pabpc11* KI mice". We have added this into the Result section (Line 252-266).

Concerning the results section, a lot of the text can be found back in the tables and figures, so some reduction of text should be performed. For example, table 1 contains all the details of patients which are easy to follow, so it's not necessary to add all the descriptive traits of involved patients in the results section.

Response: According to your suggestion, we have removed some redundant descriptive traits of involved patients in the Results section.

Regarding the KI experiments in mice, how was the gene editing efficiency confirmed in the KI mice? For example, was there any mosaic gene editing observed which could bias the infertility phenotype?

Response: In this study, the KI mice we used are F2 generation mice, and they can stably inherit the mutation to their offspring. In the mouse phenotype evaluation, all homozygous KI mice showed the same phenotype, and no difference was observed in these mice.

The authors performed IVF in the generated KI mice. Was in vivo reproduction successful in these KI mice? Are the authors capable of performing ICSI? Sometimes after performing ICSI, a more severe infertility phenotype can be observed compared to IVF, for example with PLCz KO male mice.

Response: *Pabpc11* KI female mice constructed in this study failed to reproduce *in vivo* and showed complete infertility (Fig 4A). In addition, according to your suggestion, we used G97D KI oocytes for ICSI experiments and found that KI oocytes can normally fertilize and form pronucleus after ICSI. However, in contrast to the WT zygotes, KI zygotes eventually arrested at an early stage and failed to develop into blastocysts, which is consistent with the results of IVF (Fig R1).

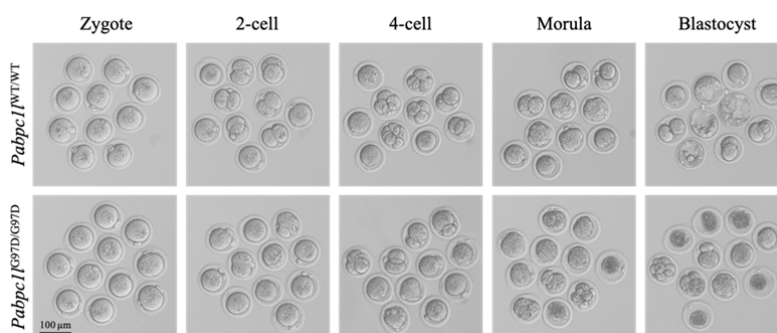

**Figure R1** The early embryonic development at different times after ICSI of superovulated oocytes from WT and *Pabpc11* G97D KI mice.

Another point to address is the lack of experimental analysis on the oocytes from these patients during/after infertility treatment. The authors should acknowledge this shortcoming.

Response: In this study, because we failed to obtain valuable clinical samples from these patients, we did not conduct experimental analysis on the oocytes from these patients, which is indeed a shortcoming of this study. We have pointed out this shortcoming in the Discussion section (Line 402-404).

Finally, it would be of added value to know from the authors which possible treatments options could be investigated to overcome this infertility problem? Nonetheless, the manuscript is clearly organized and well written. The study is of high quality and therefore, I support these results suitable for publication EMBO Molecular Medicine, following some minor modifications according to the comments listed below.

Response: Thanks for your constructive comments and appreciation on this work. Previous studies have found that microinjection of *Pabpc11* mRNA into *Pabpc11*<sup>-/-</sup> preantral follicle-enclosed oocytes rather than denuded GV oocytes could rescue oocyte maturation (Guzeloglu-Kayisli *et al.*, 2012; Lowther & Mehlmann, 2015). This strategy might provide a possible treatment option to overcome female infertility caused by PABPC1L dysfunction, but additional experiments should be pursued for evaluating effectiveness to embryonic development. We have added these sentences to the Discussion section (Line 407-412).

Reference:

1. Guzeloglu-Kayisli O, Lalioti MD, Aydinler F, Sasson I, Ilbay O, Sakkas D, Lowther KM, Mehlmann LM, Seli E (2012) Embryonic poly(A)-binding protein (EPAB) is required for oocyte maturation and female fertility in mice. *Biochem J* 446: 47-58
2. Lowther KM, Mehlmann LM (2015) Embryonic Poly(A)-Binding Protein Is Required During Early Stages of Mouse Oocyte Development for Chromatin Organization, Transcriptional Silencing, and Meiotic Competence. *Biol Reprod* 93: 43

Minor remarks

- Line 28: I would not describe it as a common cause

Response: We have corrected it and described it as “one of the important causes of female infertility” (Line 30).

- Line 115: PB1 oocyte is not a commonly used term, compared to GV and MI/MII oocytes, so please revise this

Response: As suggested, we have changed the all term “PB1 oocyte” in this manuscript to the commonly used term “MII oocyte”.

- Line 145: "The affected individual in family 2 carried the compound heterozygous variants consisting of a missense variant c.410C>T (p.Ser137Phe) and a frameshift insertion variant c.956\_957insA (p.Ile320Asnfs\*122)." The sentence might need some restructuring. An individual carrying the heterozygous variants consisting of ... feels as incorrect use of terminology.

Response: We have modified the sentence to “The affected individual in family 2 carried the compound heterozygous variants c.410C>T (p.Ser137Phe) and c.956\_957insA (p.Ile320Asnfs\*122)” (Line 139-141).

- Line 164: "We measured the expression of PABPC1L mRNA and found that PABPC1L was highly expressed in human immature GV and MI oocytes as well as in the lung, but was poorly expressed in mature MII oocyte, early embryos, and other somatic tissues (Fig 1D), suggesting an important role for PABPC1L in human oocyte maturation." Clarify in the manuscript that this data was obtained in control samples.

Response: We have clarified this data was obtained in control samples both in Results (Line 156-157) and Materials and Methods (Line 467) sections.

- Line 170: "To evaluate the functional effects of the identified pathogenic variants in vitro, we first performed immunoblot analysis in HeLa cells transfected with WT or mutant PABPC1L constructs." Clarify in the manuscript what type of constructs: plasmid delivery

Response: We have clarified all the type of constructs in the manuscript.

- Line 248: Here, I would first describe the data more generalized and only towards the end of the paragraph start focussing on the Mos-MAPK, to show that you work from generalized interpretation to targeted interpretation. Clarify a bit more why you focus on the Mos-MAPK in particular, and not the other highly differentially expressed genes.

Response: According to your suggestion, we first described the RNA-seq data more generalized as following "Gene expression levels were assessed as FPKM, and all replicates showed high correlations (Fig 5A). Compared to WT zygotes, 1,933 transcripts were downregulated and 1,952 transcripts were upregulated in G97D zygotes, while 872 transcripts were downregulated and 618 transcripts were upregulated in S137F zygotes (Fig 5B). Furthermore, Venn diagrams showed that there were 344 co-upregulated transcripts and 457 co-downregulated transcripts in the two groups (G97D vs. WT and S137F vs. WT) (Fig 5C). GO analysis revealed that the co-upregulated genes were mainly involved in positive regulation of mitogen-activated protein kinase (MAPK) cascade pathways, phosphorylation, embryonic development, etc, while the co-downregulated genes were involved in translation, cell cycle, meiotic spindle organization, etc. (Fig 5D)".

Next, we started to focus on Mos-MAPK pathway and added more descriptions to clarify why we focus on this pathway as "we first analyzed the differentially expressed genes in G97D zygotes and mainly focused on oocyte-specific genes. We found that *Mos*, an upstream activator of MAPK cascade (Dupre *et al*, 2011), was the only oocyte-specific gene among the top 30 differentially expressed genes (Dataset EV1, Fig 5B). Then we checked the expression of *Mos* in S137F zygotes and observed that it was also up-regulated (Dataset EV1, Fig 5B). The up-regulation of *Mos* in KI zygotes is consistent with the activation of MAPK cascade revealed in GO analysis. The above RNA-seq analysis results strongly suggest that Mos-MAPK pathway is abnormally activated in KI zygote. In addition, studies have indicated that abnormal activation of Mos-MAPK pathway in embryo led to cleavage arrest (Haccard *et al*, 1993; Sagata *et al*, 1989; Verlhac *et al*, 2000), which is similar to the phenotype of early embryonic arrest in KI mice". We have added all the relevant description to the Result section (Line 242-264).

- Line 297: "The infertile phenotype can be explained by abnormal activation of the Mos-MAPK pathway in zygotes." I believe this statement is too strong. For sure, Mos-MAPK is dysregulated in this model, but this is only one step in the molecular cascade leading to the observe phenotype. Please reconsider this statement. In the discussion, you approach this more carefully, which is better.

Response: We have changed this sentence to “The Mos-MAPK pathway was abnormally activated in the zygotes of KI mice, which may provide an explanation the infertile phenotype”(Line 302-303).

- Line 337: "Furthermore, all embryos obtained from the affected individuals in families 2 and 3 were arrested at an early stage, suggesting that PABPC1L also play an important role in early embryonic development prior to ZGA." I would rather state that zygote cleavage is compromised, given the drop in developmental rate between zygote and 2-cell stage shown in fig 4B.

Response: We are apologized for inadequate description of the results in Fig 4B. At 24 h after IVF, compared with WT group, the percentage of *Pabpc1l* KI zygotes dividing into 2-cell stage was indeed significantly reduced. However, as shown in Fig 4C, the cleavage of KI zygotes was delayed, and most KI zygotes could cleavage in the subsequent *in vitro* culture, but all embryos eventually arrested at an early stage and failed to develop into blastocysts. We have added a detailed description of KI zygote cleavage in the Results section (Line 233-236).

- Line 368: "In addition, *Pabpc1l* KI mice harbouring homozygous missense variants had a milder phenotype than affected individuals in families 1 and 2 harboring compound heterozygous variants consisting of a missense variant and a truncating variant." I would remove this sentence and keep comparisons between different genotypes within one species. So I would only compare mouse with mouse (so KO mouse with KI mouse) and human with human (missense with nonsense).

Response: Thank you for the suggestion, we have removed this sentence and kept comparisons between different genotypes within one species.

- Discussion: You identified novel pathogenic variants in PABPC1L leading to the observed phenotype, but as mentioned in the introduction, the genetic basis and the mechanisms involved in the majority of affected individuals remain unknown. To the discussion, you could add the frequency/pick-up rate of variants in the PABPC1L gene and add some speculation on the missing genetic basis in the majority of patients. In what type of pathways could we still find novel pathogenic variants?

Response: In this study, we identified five individuals with bi-allelic variants in *PABPC1L*, which accounts for 0.26% of our cohort of 1898 infertile woman (1394 with oocyte maturation arrest and 504 with abnormalities in fertilization and early embryonic development). In addition, we also found other candidate pathogenic genes through bioinformatics analysis, but the pathogenicity of these mutant genes needs to be further verified by *in vitro* experiments and the generation of knockout or patient-derived mutated animal models. Nevertheless, the genetic basis involved in the majority of affected individuals remain unknown, which requires extensive exploration using different research strategies. Previous studies have shown that gene-based burden test is an effective strategy for finding novel pathogenic genes in many other disorders (Cirulli *et al*, 2015; Guo *et al*, 2018; Malik *et al*, 2021). By using the strategy, *LHX8* and *KPNA7* variants were identified to cause female infertility (Wang *et al*, *J Clin Invest*, 2023; Zhao *et al*, *Genet Med*, 2022). We believe that applying gene-based burden test will reveal more genetic basis of female infertility. In addition, there is a good understanding of the functional impact of protein-coding variants in female infertility (Jiao *et al*, 2021), but less understanding of variants in non-coding regions, which accounts for 98% of the human genome. In the last decade, many studies have identified that variants in non-coding regions cause different diseases (Turro *et al*, 2020; Wakeling *et al*, 2022; Wright *et al*, 2021), which suggests that the analysis of non-coding regions in female infertility patients with unknown causes is also a powerful

strategy to find novel pathogenic variants. We have added the relevant description to the Discussion section (Line 413-433).

- Line 541: "Clean reads were aligned to the human genome hg38 using STAR and StringTie." wasn't RNAseq performed on mouse?

Response: We have modified "human genome hg38" to "mouse genome mm10" in Materials and Methods sections (Line 593).

- Line 558: The journal doesn't require you to deposit the raw sequencing data in a database?

Response: We have deposited the raw sequencing data in the Genome Sequence Archive in National Genomics Data Center, China National Center for Bioinformation/Beijing Institute of Genomics, Chinese Academy of Sciences (GSA: CRA009502) that are publicly accessible at <https://bigd.big.ac.cn/gsa/browse/CRA009502>.

Referee #3 (Remarks for Author):

This interesting and well-written manuscript by Wang et al identifies several infertile woman who exhibit defective oocyte development, and find that they bear biallelic mutations in the very interesting gene PABPC1L. In most cases, pedigree genotyping was possible, enabling the authors to reveal phasing and a recessive mode of inheritance. This paper is distinguished by the validation experiments performed by the authors. They performed various assays tailored to the allele type (e.g., mismatches vs premature stops), including transfection of mutant constructs into HeLa cells to confirm predicted protein truncations and functional defects in reporter gene translation or RNA binding. Critically, the authors generate mouse models for the nonsynonymous alleles, and find that they cause infertility phenotypes that essentially confirm the pathogenicity of the human alleles (and reveal subtle differences in mouse vs human phenotypes that are probably reflective of species differences).

Response: Thank you for your positive evaluation of this study.

Overall, this is an elegant paper with no significant weaknesses. The data support the conclusions. The experimental confirmations of variant effects set this paper aside from many other reports of infertility-causing alleles with far less evidence. I make only the following 3 minor suggestions.

Response: Thank you for your favorable view and suggestions.

- last sentence of abstract. It isn't clear if the "new marker for genetic diagnosis..." is PABPC1L or MOS mRNA levels. PABPC1L isn't really a "marker" but potential candidate to be screened for causes of infertility.

Response: We have changed this sentence into "add a potential genetic candidate gene to be screened for causes of infertility" (Line 43-44).

- Results section starts abruptly on line 104. Maybe an introductory sentence about the patient pool.

Response: We have added an introductory sentence “To investigate the genetic factors responsible for oocyte maturation arrest, we recruited 1394 infertile female individuals diagnosed with oocyte maturation arrest” at the beginning of the Results section (Line 110-111).

- sequence traces probably unnecessary in Fig. 1 (could go to Supplemental).

Response: Thank you for this important and helpful idea. We have put the sequence traces in Fig EV1.

20th Mar 2023

Dear Dr. Wang,

Thank you for the submission of your revised manuscript to EMBO Molecular Medicine. I am pleased to inform you that we will be able to accept your manuscript pending the following final amendments:

- 1) We note that you currently have together with you, a total of 3 co-corresponding authors. Is that correct? Do you confirm equal contribution of these 3 people, able to take full responsibility for the paper and its content? While there is no limit per se to the number of co-corresponding authors, 3 is rare, and may not reflect as intended to the community.
- 2) In the main manuscript file, please do the following:
  - Correct/answer the track changes suggested by our data editors by working from the attached document.
  - In M&M, please include statement that the experiments with human samples conformed to the principles set out in the WMA Declaration of Helsinki and the Department of Health and Human Services Belmont Report.
- 3) Synopsis:
  - Synopsis image: Please resize the image to 550 px-wide x (250-400)-px high and submit a high-resolution jpeg file.
  - Please check your synopsis text and image before submission with your revised manuscript. Please be aware that in the proof stage minor corrections only are allowed (e.g., typos).
- 4) As part of the EMBO Publications transparent editorial process initiative (see our Editorial at <http://embomolmed.embopress.org/content/2/9/329>), EMBO Molecular Medicine will publish online a Review Process File (RPF) to accompany accepted manuscripts. This file will be published in conjunction with your paper and will include the anonymous referee reports, your point-by-point response and all pertinent correspondence relating to the manuscript. Let us know whether you agree with the publication of the RPF and as here, if you want to remove or not any figures from it prior to publication. Please note that the Authors checklist will be published at the end of the RPF.
- 5) Please provide a point-by-point letter INCLUDING my comments as well as the reviewer's reports and your detailed responses (as Word file).

I look forward to reading a new revised version of your manuscript as soon as possible.

Yours sincerely,

Zeljko Durdevic

Zeljko Durdevic  
Editor  
EMBO Molecular Medicine

\*\*\* Instructions to submit your revised manuscript \*\*\*

\*\*\* PLEASE NOTE \*\*\* As part of the EMBO Publications transparent editorial process initiative (see our Editorial at <https://www.embopress.org/doi/pdf/10.1002/emmm.201000094>), EMBO Molecular Medicine will publish online a Review Process File to accompany accepted manuscripts.

In the event of acceptance, this file will be published in conjunction with your paper and will include the anonymous referee reports, your point-by-point response and all pertinent correspondence relating to the manuscript. If you do NOT want this file to be published, please inform the editorial office at [contact@embomolmed.org](mailto:contact@embomolmed.org).

When submitting your revised manuscript, please include:

- 1) a .docx formatted version of the manuscript text (including Figure legends and tables)
- 2) Separate figure files\*

3) supplemental information as Expanded View and/or Appendix. Please carefully check the authors guidelines for formatting Expanded view and Appendix figures and tables at <https://www.embopress.org/page/journal/17574684/authorguide#expandedview>

4) a letter INCLUDING the reviewer's reports and your detailed responses to their comments (as Word file).

5) The paper explained: EMBO Molecular Medicine articles are accompanied by a summary of the articles to emphasize the major findings in the paper and their medical implications for the non-specialist reader. Please provide a draft summary of your article highlighting

- the medical issue you are addressing,
- the results obtained and
- their clinical impact.

This may be edited to ensure that readers understand the significance and context of the research. Please refer to any of our published articles for an example.

6) For more information: There is space at the end of each article to list relevant web links for further consultation by our readers. Could you identify some relevant ones and provide such information as well? Some examples are patient associations, relevant databases, OMIM/proteins/genes links, author's websites, etc...

7) Author contributions: the contribution of every author must be detailed in a separate section.

8) EMBO Molecular Medicine now requires a complete author checklist (<https://www.embopress.org/page/journal/17574684/authorguide>) to be submitted with all revised manuscripts. Please use the checklist as guideline for the sort of information we need WITHIN the manuscript. The checklist should only be filled with page numbers where the information can be found. This is particularly important for animal reporting, antibody dilutions (missing) and exact values and n that should be indicated instead of a range.

9) Every published paper now includes a 'Synopsis' to further enhance discoverability. Synopses are displayed on the journal webpage and are freely accessible to all readers. They include a short stand first (maximum of 300 characters, including space) as well as 2-5 one sentence bullet points that summarise the paper. Please write the bullet points to summarise the key NEW findings. They should be designed to be complementary to the abstract - i.e. not repeat the same text. We encourage inclusion of key acronyms and quantitative information (maximum of 30 words / bullet point). Please use the passive voice. Please attach these in a separate file or send them by email, we will incorporate them accordingly.

You are also welcome to suggest a striking image or visual abstract to illustrate your article. If you do please provide a jpeg file 550 px-wide x 400-px high.

10) A Conflict of Interest statement should be provided in the main text

11) Please note that we now mandate that all corresponding authors list an ORCID digital identifier. This takes <90 seconds to complete. We encourage all authors to supply an ORCID identifier, which will be linked to their name for unambiguous name identification.

Currently, our records indicate that the ORCID for your account is 0000-0002-3400-0434.

Please click the link below to modify this ORCID:

Link Not Available

12) The system will prompt you to fill in your funding and payment information. This will allow Wiley to send you a quote for the article processing charge (APC) in case of acceptance. This quote takes into account any reduction or fee waivers that you may be eligible for. Authors do not need to pay any fees before their manuscript is accepted and transferred to our publisher.

\*Additional important information regarding Figures

Each figure should be given in a separate file and should have the following resolution:

Graphs 800-1,200 DPI

Photos 400-800 DPI

Colour (only CMYK) 300-400 DPI"

Figures are not edited by the production team. All lettering should be the same size and style; figure panels should be indicated by capital letters (A, B, C etc). Gridlines are not allowed except for log plots. Figures should be numbered in the order of their



appearance in the text with Arabic numerals. Each Figure must have a separate legend and a caption is needed for each panel.

\*Additional important information regarding figures and illustrations can be found at <https://bit.ly/EMBOPressFigurePreparationGuideline>. See also figure legend preparation guidelines: <https://www.embopress.org/page/journal/17574684/authorguide#figureformat>

The system will prompt you to fill in your funding and payment information. This will allow Wiley to send you a quote for the article processing charge (APC) in case of acceptance. This quote takes into account any reduction or fee waivers that you may be eligible for. Authors do not need to pay any fees before their manuscript is accepted and transferred to our publisher.

\*\*\*\*\* Reviewer's comments \*\*\*\*\*

Referee #1 (Remarks for Author):

The authors added more experiments to their work allowing to answer the Reviewer's comments.

Referee #2 (Comments on Novelty/Model System for Author):

high quality study

Referee #2 (Remarks for Author):

The authors addressed my concerns adequately, and performed additional experiments like ICSI.

The authors addressed the remaining editorial issues.

29th Mar 2023

Dear Dr. Wang,

We are pleased to inform you that your manuscript is accepted for publication and is now being sent to our publisher to be included in the next available issue of EMBO Molecular Medicine.

Please read below for additional IMPORTANT information regarding your article, its publication and the production process.

Congratulations on your interesting work,

Zeljko Durdevic

Zeljko Durdevic  
Editor  
EMBO Molecular Medicine

Follow us on Twitter @EmboMolMed  
Sign up for eTOCs at [embopress.org/alertsfeeds](http://embopress.org/alertsfeeds)

\*\*\* \*\* IMPORTANT INFORMATION \*\* \*\*

#### SPEED OF PUBLICATION

The journal aims for rapid publication of papers, using the advance online publication "Early View" to expedite the process: A properly copy-edited and formatted version will be published as "Early View" after the proofs have been corrected. Please help the Editors and publisher avoid delays by providing e-mail address(es), telephone and fax numbers at which author(s) can be contacted.

Should you be planning a Press Release on your article, please get in contact with [embomolmed@wiley.com](mailto:embomolmed@wiley.com) as early as possible, in order to coordinate publication and release dates.

#### LICENSE AND PAYMENT:

All articles published in EMBO Molecular Medicine are fully open access: immediately and freely available to read, download and share.

EMBO Molecular Medicine charges an article processing charge (APC) to cover the publication costs. You, as the corresponding author for this manuscript, should have already received a quote with the article processing fee separately. Please let us know in case this quote has not been received.

Once your article is at Wiley for editorial production you will receive an email from Wiley's Author Services system, which will ask you to log in and will present you with the publication license form for completion. Within the same system the publication fee can be paid by credit card, an invoice, pro forma invoice or purchase order can be requested.

Payment of the publication charge and the signed Open Access Agreement form must be received before the article can be published online.

#### PROOFS

You will receive the proofs by e-mail approximately 2 weeks after all relevant files have been sent to our Production Office. Please return them within 48 hours and if there should be any problems, please contact the production office at [embopressproduction@wiley.com](mailto:embopressproduction@wiley.com).

Please inform us if there is likely to be any difficulty in reaching you at the above address at that time. Failure to meet our

deadlines may result in a delay of publication.

All further communications concerning your paper proofs should quote reference number EMM-2022-17177-V3 and be directed to the production office at [embopressproduction@wiley.com](mailto:embopressproduction@wiley.com).

Thank you,

Zeljko Durdevic  
Editor  
EMBO Molecular Medicine

## EMBO Press Author Checklist

|                                               |
|-----------------------------------------------|
| Corresponding Author Name: Lei Wang, Ge Lin   |
| Journal Submitted to: EMBO Molecular Medicine |
| Manuscript Number: EMM-2022-17177             |

### USEFUL LINKS FOR COMPLETING THIS FORM

- [The EMBO Journal - Author Guidelines](#)
- [EMBO Reports - Author Guidelines](#)
- [Molecular Systems Biology - Author Guidelines](#)
- [EMBO Molecular Medicine - Author Guidelines](#)

### Reporting Checklist for Life Science Articles (updated January 2022)

This checklist is adapted from Materials Design Analysis Reporting (MDAR) Checklist for Authors. MDAR establishes a minimum set of requirements in transparent reporting in the life sciences (see Statement of Task: [10.31222/osf.io/9sm4x](https://doi.org/10.31222/osf.io/9sm4x)). Please follow the journal's guidelines in preparing your manuscript.

**Please note that a copy of this checklist will be published alongside your article.**

### Abridged guidelines for figures

#### 1. Data

The data shown in figures should satisfy the following conditions:

- the data were obtained and processed according to the field's best practice and are presented to reflect the results of the experiments in an accurate and unbiased manner.
- ideally, figure panels should include only measurements that are directly comparable to each other and obtained with the same assay.
- plots include clearly labeled error bars for independent experiments and sample sizes. Unless justified, error bars should not be shown for technical replicates.
- if  $n < 5$ , the individual data points from each experiment should be plotted. Any statistical test employed should be justified.
- Source Data should be included to report the data underlying figures according to the guidelines set out in the authorship guidelines on Data Presentation.

#### 2. Captions

Each figure caption should contain the following information, for each panel where they are relevant:

- a specification of the experimental system investigated (eg cell line, species name).
- the assay(s) and method(s) used to carry out the reported observations and measurements.
- an explicit mention of the biological and chemical entity(ies) that are being measured.
- an explicit mention of the biological and chemical entity(ies) that are altered/varied/perturbed in a controlled manner.
- the exact sample size (n) for each experimental group/condition, given as a number, not a range;
- a description of the sample collection allowing the reader to understand whether the samples represent technical or biological replicates (including how many animals, litters, cultures, etc.).
- a statement of how many times the experiment shown was independently replicated in the laboratory.
- definitions of statistical methods and measures:
  - common tests, such as t-test (please specify whether paired vs. unpaired), simple  $\chi^2$  tests, Wilcoxon and Mann-Whitney tests, can be unambiguously identified by name only, but more complex techniques should be described in the methods section;
  - are tests one-sided or two-sided?
  - are there adjustments for multiple comparisons?
  - exact statistical test results, e.g., P values = x but not P values < x;
  - definition of 'center values' as median or average;
  - definition of error bars as s.d. or s.e.m.

**Please complete ALL of the questions below.**  
Select "Not Applicable" only when the requested information is not relevant for your study.

### Materials

| Newly Created Materials                                                                                                                                                                                       | Information included in the manuscript? | In which section is the information available?<br>(Reagents and Tools Table, Materials and Methods, Figures, Data Availability Section) |
|---------------------------------------------------------------------------------------------------------------------------------------------------------------------------------------------------------------|-----------------------------------------|-----------------------------------------------------------------------------------------------------------------------------------------|
| New materials and reagents need to be available; do any restrictions apply?                                                                                                                                   | Yes                                     | Materials and Methods                                                                                                                   |
| Antibodies                                                                                                                                                                                                    | Information included in the manuscript? | In which section is the information available?<br>(Reagents and Tools Table, Materials and Methods, Figures, Data Availability Section) |
| For <b>antibodies</b> provide the following information:<br>- Commercial antibodies: RRID (if possible) or supplier name, catalogue number and/or clone number<br>- Non-commercial: RRID or citation          | Yes                                     | Materials and Methods                                                                                                                   |
| DNA and RNA sequences                                                                                                                                                                                         | Information included in the manuscript? | In which section is the information available?<br>(Reagents and Tools Table, Materials and Methods, Figures, Data Availability Section) |
| Short novel DNA or RNA including primers, probes: provide the sequences.                                                                                                                                      | Yes                                     | Appendix Table S1                                                                                                                       |
| Cell materials                                                                                                                                                                                                | Information included in the manuscript? | In which section is the information available?<br>(Reagents and Tools Table, Materials and Methods, Figures, Data Availability Section) |
| <b>Cell lines:</b> Provide species information, strain. Provide accession number in repository OR supplier name, catalog number, clone number, and/OR RRID.                                                   | Yes                                     | Materials and Methods                                                                                                                   |
| <b>Primary cultures:</b> Provide species, strain, sex of origin, genetic modification status.                                                                                                                 | Not Applicable                          |                                                                                                                                         |
| Report if the cell lines were recently <b>authenticated</b> (e.g., by STR profiling) and tested for mycoplasma contamination.                                                                                 | Not Applicable                          |                                                                                                                                         |
| Experimental animals                                                                                                                                                                                          | Information included in the manuscript? | In which section is the information available?<br>(Reagents and Tools Table, Materials and Methods, Figures, Data Availability Section) |
| <b>Laboratory animals or Model organisms:</b> Provide species, strain, sex, age, genetic modification status. Provide accession number in repository OR supplier name, catalog number, clone number, OR RRID. | Yes                                     | Materials and Methods                                                                                                                   |
| <b>Animal observed in or captured from the field:</b> Provide species, sex, and age where possible.                                                                                                           | Not Applicable                          |                                                                                                                                         |
| Please detail housing and husbandry conditions.                                                                                                                                                               | Not Applicable                          |                                                                                                                                         |
| Plants and microbes                                                                                                                                                                                           | Information included in the manuscript? | In which section is the information available?<br>(Reagents and Tools Table, Materials and Methods, Figures, Data Availability Section) |
| <b>Plants:</b> provide species and strain, ecotype and cultivar where relevant, unique accession number if available, and source (including location for collected wild specimens).                           | Not Applicable                          |                                                                                                                                         |
| <b>Microbes:</b> provide species and strain, unique accession number if available, and source.                                                                                                                | Not Applicable                          |                                                                                                                                         |
| Human research participants                                                                                                                                                                                   | Information included in the manuscript? | In which section is the information available?<br>(Reagents and Tools Table, Materials and Methods, Figures, Data Availability Section) |
| If collected and within the bounds of privacy constraints report on age, sex and gender or ethnicity for all study participants.                                                                              | Yes                                     | Table 1                                                                                                                                 |
| Core facilities                                                                                                                                                                                               | Information included in the manuscript? | In which section is the information available?<br>(Reagents and Tools Table, Materials and Methods, Figures, Data Availability Section) |
| If your work benefited from core facilities, was their service mentioned in the acknowledgments section?                                                                                                      | Not Applicable                          |                                                                                                                                         |

### Design

| <b>Study protocol</b>                                                                                                                                                                                                                                                                                                                      | <b>Information included in the manuscript?</b> | <b>In which section is the information available?</b><br>(Reagents and Tools Table, Materials and Methods, Figures, Data Availability Section) |
|--------------------------------------------------------------------------------------------------------------------------------------------------------------------------------------------------------------------------------------------------------------------------------------------------------------------------------------------|------------------------------------------------|------------------------------------------------------------------------------------------------------------------------------------------------|
| If study protocol has been <b>pre-registered</b> , provide DOI in the manuscript. For clinical trials, provide the trial registration number OR cite DOI.                                                                                                                                                                                  | Not Applicable                                 |                                                                                                                                                |
| Report the <b>clinical trial registration number</b> (at ClinicalTrials.gov or equivalent), where applicable.                                                                                                                                                                                                                              | Not Applicable                                 |                                                                                                                                                |
| <b>Laboratory protocol</b>                                                                                                                                                                                                                                                                                                                 | <b>Information included in the manuscript?</b> | <b>In which section is the information available?</b><br>(Reagents and Tools Table, Materials and Methods, Figures, Data Availability Section) |
| Provide DOI OR other citation details if <b>external detailed step-by-step protocols</b> are available.                                                                                                                                                                                                                                    | Not Applicable                                 |                                                                                                                                                |
| <b>Experimental study design and statistics</b>                                                                                                                                                                                                                                                                                            | <b>Information included in the manuscript?</b> | <b>In which section is the information available?</b><br>(Reagents and Tools Table, Materials and Methods, Figures, Data Availability Section) |
| Include a statement about <b>sample size</b> estimate even if no statistical methods were used.                                                                                                                                                                                                                                            | Yes                                            | Materials and Methods                                                                                                                          |
| Were any steps taken to minimize the effects of subjective bias when allocating animals/samples to treatment (e.g. <b>randomization procedure</b> )? If yes, have they been described?                                                                                                                                                     | Not Applicable                                 |                                                                                                                                                |
| Include a statement about <b>blinding</b> even if no blinding was done.                                                                                                                                                                                                                                                                    | Not Applicable                                 |                                                                                                                                                |
| Describe <b>inclusion/exclusion criteria</b> if samples or animals were excluded from the analysis. Were the criteria pre-established?                                                                                                                                                                                                     | Not Applicable                                 |                                                                                                                                                |
| If sample or data points were omitted from analysis, report if this was due to attrition or intentional exclusion and provide justification.                                                                                                                                                                                               |                                                |                                                                                                                                                |
| For every figure, are <b>statistical tests</b> justified as appropriate? Do the data meet the assumptions of the tests (e.g., normal distribution)? Describe any methods used to assess it. Is there an estimate of variation within each group of data? Is the variance similar between the groups that are being statistically compared? | Yes                                            | Materials and Methods, Figure legends                                                                                                          |
| <b>Sample definition and in-laboratory replication</b>                                                                                                                                                                                                                                                                                     | <b>Information included in the manuscript?</b> | <b>In which section is the information available?</b><br>(Reagents and Tools Table, Materials and Methods, Figures, Data Availability Section) |
| In the figure legends: state number of times the experiment was <b>replicated</b> in laboratory.                                                                                                                                                                                                                                           | Yes                                            | Figure legends                                                                                                                                 |
| In the figure legends: define whether data describe <b>technical or biological replicates</b> .                                                                                                                                                                                                                                            | Yes                                            | Figure legends                                                                                                                                 |

#### Ethics

| <b>Ethics</b>                                                                                                                                                                                                                                                                                            | <b>Information included in the manuscript?</b> | <b>In which section is the information available?</b><br>(Reagents and Tools Table, Materials and Methods, Figures, Data Availability Section) |
|----------------------------------------------------------------------------------------------------------------------------------------------------------------------------------------------------------------------------------------------------------------------------------------------------------|------------------------------------------------|------------------------------------------------------------------------------------------------------------------------------------------------|
| Studies involving <b>human participants</b> : State details of <b>authority granting ethics approval</b> (IRB or equivalent committee(s), provide reference number for approval.                                                                                                                         | Yes                                            | Materials and Methods                                                                                                                          |
| Studies involving <b>human participants</b> : Include a statement confirming that <b>informed consent</b> was obtained from all subjects and that the experiments conformed to the principles set out in the WMA Declaration of Helsinki and the Department of Health and Human Services Belmont Report. | Yes                                            | Materials and Methods                                                                                                                          |
| Studies involving <b>human participants</b> : For publication of <b>patient photos</b> , include a statement confirming that consent to publish was obtained.                                                                                                                                            | Not Applicable                                 |                                                                                                                                                |
| Studies involving experimental <b>animals</b> : State details of <b>authority granting ethics approval</b> (IRB or equivalent committee(s), provide reference number for approval. Include a statement of compliance with ethical regulations.                                                           | Yes                                            | Materials and Methods                                                                                                                          |
| Studies involving <b>specimen and field samples</b> : State if relevant <b>permits</b> obtained, provide details of authority approving study; if none were required, explain why.                                                                                                                       | Not Applicable                                 |                                                                                                                                                |
| <b>Dual Use Research of Concern (DURC)</b>                                                                                                                                                                                                                                                               | <b>Information included in the manuscript?</b> | <b>In which section is the information available?</b><br>(Reagents and Tools Table, Materials and Methods, Figures, Data Availability Section) |
| Could your study fall under dual use research restrictions? Please check biosecurity documents and list of <b>select agents and toxins</b> (CDC): <a href="https://www.selectagents.gov/sat/list.htm">https://www.selectagents.gov/sat/list.htm</a> .                                                    | Not Applicable                                 |                                                                                                                                                |
| If you used a select agent, is the security level of the lab appropriate and reported in the manuscript?                                                                                                                                                                                                 | Not Applicable                                 |                                                                                                                                                |
| If a study is subject to dual use research of concern regulations, is the name of the <b>authority granting approval</b> and <b>reference number</b> for the regulatory approval provided in the manuscript?                                                                                             | Not Applicable                                 |                                                                                                                                                |

#### Reporting

The MDAR framework recommends adoption of discipline-specific guidelines, established and endorsed through community initiatives. Journals have their own policy about requiring specific guidelines and recommendations to complement MDAR.

| <b>Adherence to community standards</b>                                                                                                                                                                                                                                                                                              | <b>Information included in the manuscript?</b> | <b>In which section is the information available?</b><br>(Reagents and Tools Table, Materials and Methods, Figures, Data Availability Section) |
|--------------------------------------------------------------------------------------------------------------------------------------------------------------------------------------------------------------------------------------------------------------------------------------------------------------------------------------|------------------------------------------------|------------------------------------------------------------------------------------------------------------------------------------------------|
| State if relevant guidelines or checklists (e.g., ICMJE, MIBBI, ARRIVE, PRISMA) have been followed or provided.                                                                                                                                                                                                                      | Not Applicable                                 |                                                                                                                                                |
| For <b>tumor marker prognostic studies</b> , we recommend that you follow the <b>REMARK</b> reporting guidelines (see link list at top right). See author guidelines, under 'Reporting Guidelines'. Please confirm you have followed these guidelines.                                                                               | Not Applicable                                 |                                                                                                                                                |
| For <b>phase II and III randomized controlled trials</b> , please refer to the <b>CONSORT</b> flow diagram (see link list at top right) and submit the <b>CONSORT</b> checklist (see link list at top right) with your submission. See author guidelines, under 'Reporting Guidelines'. Please confirm you have submitted this list. | Not Applicable                                 |                                                                                                                                                |

#### Data Availability

| <b>Data availability</b>                                                                                                                                                                          | <b>Information included in the manuscript?</b> | <b>In which section is the information available?</b><br>(Reagents and Tools Table, Materials and Methods, Figures, Data Availability Section) |
|---------------------------------------------------------------------------------------------------------------------------------------------------------------------------------------------------|------------------------------------------------|------------------------------------------------------------------------------------------------------------------------------------------------|
| Have <b>primary datasets</b> been deposited according to the journal's guidelines (see 'Data Deposition' section) and the respective accession numbers provided in the Data Availability Section? | Yes                                            | Materials and Methods                                                                                                                          |
| Were <b>human clinical and genomic datasets</b> deposited in a public access-controlled repository in accordance to ethical obligations to the patients and to the applicable consent agreement?  | Not Applicable                                 |                                                                                                                                                |
| Are <b>computational models</b> that are central and integral to a study available without restrictions in a machine-readable form? Were the relevant accession numbers or links provided?        | Not Applicable                                 |                                                                                                                                                |
| If publicly available data were reused, provide the respective <b>data citations</b> in the reference list.                                                                                       | Not Applicable                                 |                                                                                                                                                |
